# Supplementary material
Source: PubMed Central journal article supplement (PMC3315832)
Supplement: supp_EJE-11-0856_110856-stable.pdf [file supp_EJE-11-0856_110856-stable.pdf]

**Supplementary table 1** Clinical and histopathological data of tumor and reference thyroid tissue analyzed.

| Sample group                              | Diagnosis         | Gender | Age at  | CLT in        | Sample        | Sample studied by |         |     |
|-------------------------------------------|-------------------|--------|---------|---------------|---------------|-------------------|---------|-----|
|                                           |                   | M / F  | surgery | sample        | studied       | 2-DE              | Western | IHC |
| <i>Reference thyroid</i>                  | FTA - cold nodule | M      | 33      | No            | Thyroid       | Yes               | -       | -   |
|                                           | FTA - cold nodule | M      | 38      | No            | Thyroid       | Yes               | Yes     | -   |
|                                           | FTA - cold nodule | F      | 41      | Yes           | Thyroid       | Yes               | Yes     | -   |
|                                           | FTA - cold nodule | M      | 56      | No            | Thyroid       | Yes               | -       | -   |
|                                           | FTA - cold nodule | F      | 29      | No            | Thyroid       | Yes               | Yes     | -   |
|                                           | FTC - MI          | M      | 25      | No            | Thyroid       | Yes               | Yes     | -   |
|                                           | FTA - cold nodule | F      | 47      | No            | Thyroid       | Yes               | -       | -   |
|                                           | FTA - cold nodule | F      | 72      | No            | Thyroid       | Yes               | Yes     | Yes |
|                                           | FTA - cold nodule | F      | 51      | No            | Thyroid       | Yes               | -       | Yes |
|                                           | FTA - cold nodule | F      | 27      | No            | Thyroid       | Yes               | Yes     | -   |
| <i>Follicular thyroid adenoma (FTA)</i>   | FTA - cold nodule | F      | 67      | No            | Primary tumor | Yes               | Yes     | Yes |
|                                           | FTA - cold nodule | F      | 88      | No            | Primary tumor | Yes               | -       | Yes |
|                                           | FTA - cold nodule | F      | 30      | No            | Primary tumor | Yes               | Yes     | Yes |
|                                           | FTA - cold nodule | M      | 36      | No            | Primary tumor | Yes               | Yes     | Yes |
|                                           | FTA - cold nodule | M      | 60      | No            | Primary tumor | Yes               | Yes     | Yes |
|                                           | FTA - cold nodule | F      | 41      | No            | Primary tumor | Yes               | Yes     | Yes |
|                                           | FTA - cold nodule | F      | 37      | No            | Primary tumor | Yes               | Yes     | Yes |
|                                           | FTA - cold nodule | F      | 61      | No            | Primary tumor | Yes               | Yes     | Yes |
|                                           | FTA - cold nodule | F      | 23      | No            | Primary tumor | Yes               | Yes     | Yes |
| FTA - cold nodule                         | F                 | 50     | No      | Primary tumor | Yes           | Yes               | -       |     |
| <i>Follicular thyroid carcinoma (FTC)</i> | FTC - MI          | F      | 51      | No            | Primary tumor | Yes               | -       | Yes |
|                                           | FTC - MI          | M      | 73      | No            | Primary tumor | Yes               | -       | Yes |
|                                           | FTC - MI          | M      | 52      | No            | Primary tumor | Yes               | Yes     | Yes |
|                                           | FTC - WI          | F      | 45      | No            | Primary tumor | Yes               | Yes     | Yes |
|                                           | FTC - WI          | F      | 52      | No            | Primary tumor | Yes               | Yes     | Yes |
|                                           | FTC - MI          | F      | 17      | No            | Primary tumor | Yes               | Yes     | Yes |
|                                           | FTC - WI          | M      | 65      | No            | Primary tumor | Yes               | Yes     | Yes |
|                                           | FTC - WI          | F      | 64      | No            | Primary tumor | Yes               | Yes     | Yes |
|                                           | FTC - WI          | F      | 14      | No            | Primary tumor | Yes               | Yes     | Yes |
| <i>Papillary thyroid carcinoma (PTC)</i>  | Classic PTC       | F      | 38      | No            | Primary tumor | Yes               | Yes     | Yes |
|                                           | Classic PTC       | F      | 68      | No            | Primary tumor | Yes               | Yes     | Yes |
|                                           | Classic PTC       | M      | 48      | No            | Primary tumor | Yes               | Yes     | Yes |
|                                           | Classic PTC       | F      | 97      | No            | Primary tumor | Yes               | Yes     | Yes |
|                                           | Classic PTC       | F      | 45      | No            | Primary tumor | Yes               | Yes     | Yes |
|                                           | Classic PTC       | F      | 48      | No            | Primary tumor | Yes               | -       | Yes |
|                                           | Classic PTC       | F      | 35      | No            | Primary tumor | Yes               | Yes     | Yes |
|                                           | Classic PTC       | M      | 25      | No            | Primary tumor | Yes               | -       | Yes |
|                                           | Classic PTC       | F      | 32      | No            | Primary tumor | Yes               | Yes     | Yes |
|                                           | Classic PTC       | F      | 39      | No            | Primary tumor | Yes               | Yes     | Yes |

M, Male; F, female; CLT, Chronic lymphocytic thyroiditis; MI, Minimally invasive; WI, widely invasive; FTA, Follicular thyroid adenoma; FTC, Follicular thyroid carcinoma; PTC, Papillary thyroid carcinoma.
